# Supplementary material
Source: bioRxiv or medRxiv preprint supplement (https://medrxiv.org/highwire/filestream/74649/field_highwire_adjunct_files/0/2020.03.24.20042374-1.pdf)
Supplement: Supplementary file [file 2020.03.24.20042374-1.pdf]

## Supplementary Materials:

### Method:

#### Data collection:

We collected the epidemic data, including the number of daily and cumulative confirmed cases and deaths, from 10<sup>th</sup> January 2020 to 7<sup>th</sup> March 2020 based on official reports from the Wuhan Municipal Health Commission [1] and the Health Commission of Hubei Province [2] (Table S1). Change of definition for confirmed cases was noted in the data reports. Before treatment guideline version 5 [3] (published on 8<sup>th</sup> February), all positive cases needed to be confirmed by laboratory tests. This guideline was effective for only 11 days until 18<sup>th</sup> February. During this period, the definition of confirmed cases was changed to include both laboratory and clinical diagnoses, which resulted in a reverse-addition of over 14000 cases (Figure S3a). The treatment guideline v6 [4] became effective on 19<sup>th</sup> February, and the definition reversed to include the laboratory-confirmed cases only. However, all previously clinically confirmed cases remained unchanged. We collected clinical, disease progression and behavioural parameters from published literature (Table S2).

#### Model formulation and assumptions

We constructed a compartmental dynamic model to describe the transmission of COVID-19 in Wuhan city, China. The population was divided into thirteen compartments (Figure S1), including susceptible individuals, asymptomatic infected individuals in the incubation period, undiagnosed infected individuals (with mild, moderate, and severe/critical symptoms), clinically diagnosed cases with radiographic evidence of pneumonia but negative laboratory testing results (with mild, moderate, and severe/critical symptoms), laboratory diagnosed cases (with mild, moderate, and severe/critical symptoms), recovered and death cases. Notably, a key assumption we made is that asymptomatic individual during the incubation period is capable of transmitting the virus [5, 6] (detail assumptions in the Supplementary Materials). We did not consider the potential impact of resumption of intercity travel on the spread of the epidemic to other parts of the country in this model but assumed it would be the same as residual cases remaining in the city.

We modelled three modes of transmission, including contacts in public venues (e.g. public transportations, supermarkets and offices), household and hospitals. The probability of acquisition in each of these venues depends on two modifiable behaviours, the number of person-to-person contacts and facial mask usage. The use of facial mask was able to reduce aerosol transmission of the virus and also transmission via hand-face contacts [7]. The implementation and lifting of the metropolitan-wide quarantine would increase or decrease these behaviours (details in Table S2), hence alter the trajectory of the epidemic. Notably, in hospitals, both non-COVID-19 patients on-site and medical staff were at-risk of infections, and the probability of acquisition of medical staff is higher than on-site patients due to a higher contact rate.

#### Model calibration

We calibrated the model to the daily and deaths cases by minimising the differences between model simulations and the observed data based on a nonlinear least-squares method (Figure S3). Unknown parameters were sampled within their bounds using the Latin hypercube sampling and repeated 1000 times. We ranked all simulations by the sum of squared errors

and selected the top 10% of the least error to generate the 95% confidence intervals of the model outputs. A new set of bounds was generated based on the selected simulations, and the parameters were re-sampled. The iteration was repeated for ten times. The last selected set of results provided the 95% confidence intervals of the model outputs. Our calibration was also adjusted to adapt the temporary changes in the definition of confirmed cases to include both clinically and laboratory diagnosis according to treatment guideline v5 (Figure S3a). All analyses and simulations were performed in MATLAB R 2019a.

### **Construction of scenarios**

We constructed the scenarios for the implementation (initiated on 23<sup>rd</sup> January 2020) and lifting of the metropolitan-wide quarantine at various dates (21<sup>st</sup> March, 28<sup>th</sup> April, 4<sup>th</sup> April, 11<sup>th</sup> April, 18<sup>th</sup> April and 25<sup>th</sup> April). These days are each seven days apart. We assumed that the implementation and lifting would mainly affect person-to-person contacts and the use of a facial mask. Upon implementing the quarantine, the number of public contacts per person-day had significantly reduced by 80% whereas household contacts were tripled. Upon lifting the quarantine, we projected the epidemic at scenarios where the number of public contacts was returned to 50%, 80%, 100% and 150% of the pre-quarantine level and facial mask usage at 95%, 80%, 50% and 10%. We assumed household contacts would return to the pre-quarantine level after lifting the quarantine. In all the scenarios, the numbers of hospital contacts for patients and doctors were set at 20 and 60 per person-day, but they were allowed to decrease in the same rate as the number of diagnosed infected individuals after the peak of the epidemic. We included for completeness' sake the day when all internal cases were likely to have resolved although acknowledge that with intercity travel, this scenario is not a practical option.

## **Model details**

### **1. Model formulation**

We proposed a dynamic compartmental model to describe the transmission of COVID-19 in Wuhan city, Hubei province, China. The population was divided into thirteen compartments (**Figure S1**): susceptible individuals ( $S$ ), asymptomatic (but infectious) individuals during the incubation period ( $E$ ), undiagnosed infectious individuals with mild ( $I_1$ ), moderate ( $I_2$ ), and severe/critical ( $I_3$ ) symptoms, clinical diagnosed cases with radiographic evidence of pneumonia, but testing result negative at the mild ( $D_1$ ), moderate ( $D_2$ ), and severe/critical ( $D_3$ ) stage, treated individuals after lab diagnosis at the mild ( $T_1$ ), moderate ( $T_2$ ), and severe/critical ( $T_3$ ) stage, recovered ( $R$ ) and dead ( $D$ ) individuals. The total population size was denoted as  $N$ , ( $N=S+E+I_1+I_2+I_3+D_1+D_2+D_3+T_1+T_2+T_3+R$ ).

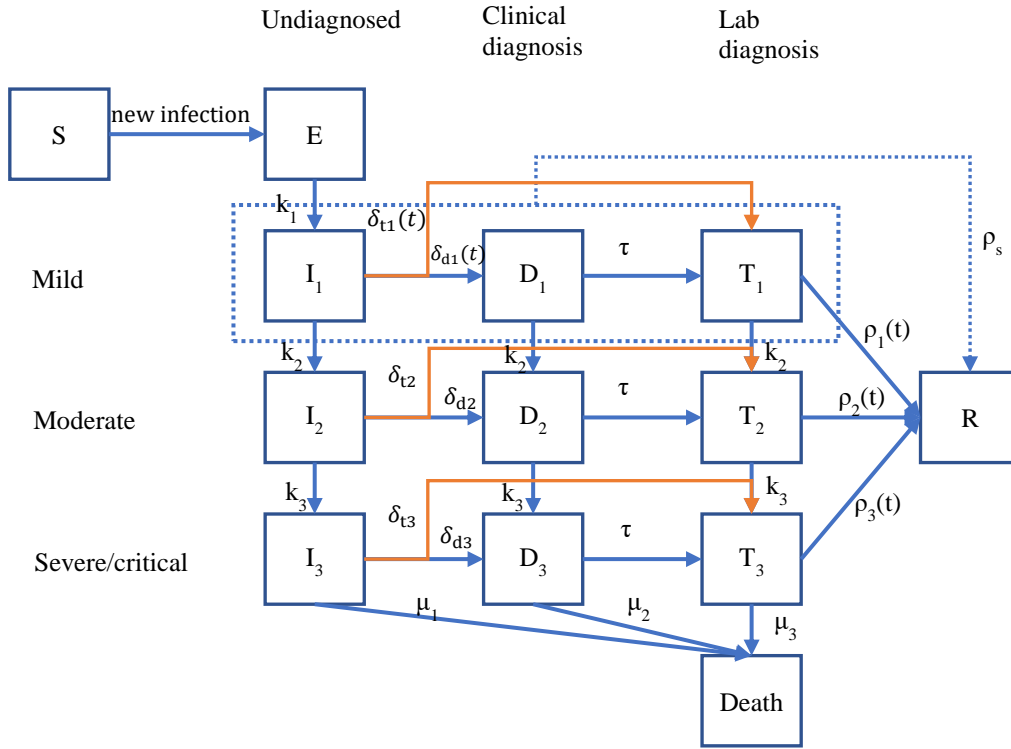

**Figure S1.** A schematic flow diagram of COVID-19 infection. The recovery rate of clinically diagnosed cases at the mild ( $D_1$ ), moderate ( $D_2$ ), and severe/critical ( $D_3$ ) stage are  $\rho_{d1}(t)$ ,  $\rho_{d2}(t)$ ,  $\rho_{d3}(t)$ , respectively, and not shown here due to too many arrows.

Susceptible individuals became infected by being in contact with latent ( $E$ ) and undiagnosed infectious individuals with symptoms ( $I_1$ ,  $I_2$ ,  $I_3$ ) in the public space and household (private space), and in contact with infected individuals ( $D_1$ ,  $D_2$ ,  $D_3$ ,  $T_1$ ,  $T_2$ ,  $T_3$ ) in a hospital setting. The overall rate of infection was given as the sum of rates of infections via these routes. That is,

$$\Lambda_{total} = \Lambda_{pub} + \Lambda_{pri} + \Lambda_{hos_p} + \Lambda_{hos_d}$$

, and for each of route of transmission,

(1) public contacts

$$\Lambda_{pub} = \beta_E^{pub}(t) \frac{SE}{N} + \beta_I^{pub}(t) \frac{S \sum_{i=1}^3 I_i}{N}$$

(2) household contacts

$$\Lambda_{pri} = \beta_E^{pri}(t) \frac{S_f E}{N_f} + \beta_I^{pri}(t) \frac{S_f \sum_{i=1}^3 I_i}{N_f}$$

(3) non-COVID-19 patients in contact with COVID-19 infected individuals in a hospital setting

$$\Lambda_{hos_p} = \beta_{Ip}^{hos}(t) \frac{S_p \sum_{i=1}^3 I_i}{N_p}$$

(4) medical staff in contact with COVID-19 infected individuals in a hospital setting

$$\Lambda_{hos_d} = \beta_{Id}^{hos}(t) \frac{S_d \sum_{i=1}^3 (D_i + T_i)}{N_d},$$

where

$$\begin{aligned}\beta_I^{pub}(t) &= \beta m_1(t)(1 - \theta_1 p_1(t)), \beta_E^{pub}(t) = (1 - \varepsilon)\beta_I^{pub}(t), \\ \beta_I^{pri}(t) &= \beta m_2(t)(1 - \theta_1 p_2), \beta_E^{pri}(t) = (1 - \varepsilon)\beta_I^{pri}(t), \\ \beta_{Ip}^{hos}(t) &= \beta_{hos} m_3(1 - \theta_1 p_3), \beta_{Id}^{hos}(t) = \beta_{hos} m_4(1 - \theta_2 p_3),\end{aligned}$$

of which  $\beta$  denoted the probability of transmission per contact with the infectious individuals with symptoms, and we assumed this probability was lower  $((1 - \varepsilon)\beta$ , here  $0 \leq \varepsilon \leq 1$  denotes the reduction in per-act transmission probability) when in contact with the latent individuals.  $\beta_{hos}$  denoted the probability of transmission per contact in the hospital.  $m_1(t)$  and  $m_2(t)$  denoted the average number of daily person-to-person contacts in the public space and household, respectively.  $p_1(t)$ ,  $p_2$  and  $p_3$  denoted the usage rate of the mask in the public space, household and hospital, respectively.  $\theta_1$  and  $\theta_2$  denoted the effectiveness of facial mask/respirators for infection prevention by the general population and medical staff, respectively.  $m_3$  denoted the average daily contacts between patients in a hospital setting.  $m_4$  denoted the average daily contacts between medical staff and COVID-19 infected patients.

Estimation of the population size and number of susceptibles for each route of transmission

For public contacts, the overall population size ( $N$ ) was the number of residents in Wuhan city, whereas the number of susceptibles was the number of individuals free of COVID-19 infection ( $S$ ).

For household contacts, the overall population size ( $N_f$ ) was estimated as the total number of households members that are at-risk of COVID-19 infection, whereas the number of susceptible household members ( $S_f$ ) is the difference between  $N_f$  and the number of infected individuals in these households. We assumed that the number of the households at-risk of infection was same as the number of individuals infected in public space because the probability of two or more household members was infected at the same time but at different public venues was very small. Hence,

$$N_f(t) = rF_1(t),$$

Where  $r$  was the average number of household members in a Chinese family and  $F_1(t)$  was the cumulative number of individuals infected in public space  $F_1(t)$ , given by

$$F_1(t) = \int_0^t \left( \beta_E^{pub}(t) \frac{SE}{N} + \beta_I^{pub}(t) \frac{S \sum_{i=1}^3 I_i}{N} \right) dt.$$

Further, the number of susceptible household members was given as,

$$S_f(t) = (r - 1)F_1(t) - F_2(t),$$

where  $F_2(t)$  denoted the accumulated number of infected household members through household transmission,

$$F_2(t) = \int_0^t \left( \beta_E^{pri}(t) \frac{S_f E}{N_f} + \beta_I^{pri}(t) \frac{S_f \sum_{i=1}^3 I_i}{N_f} \right) dt.$$

An illustration of household transmission was presented in **Figure S2**.

For hospital contacts, we assumed that individuals who were suspected of infections but not

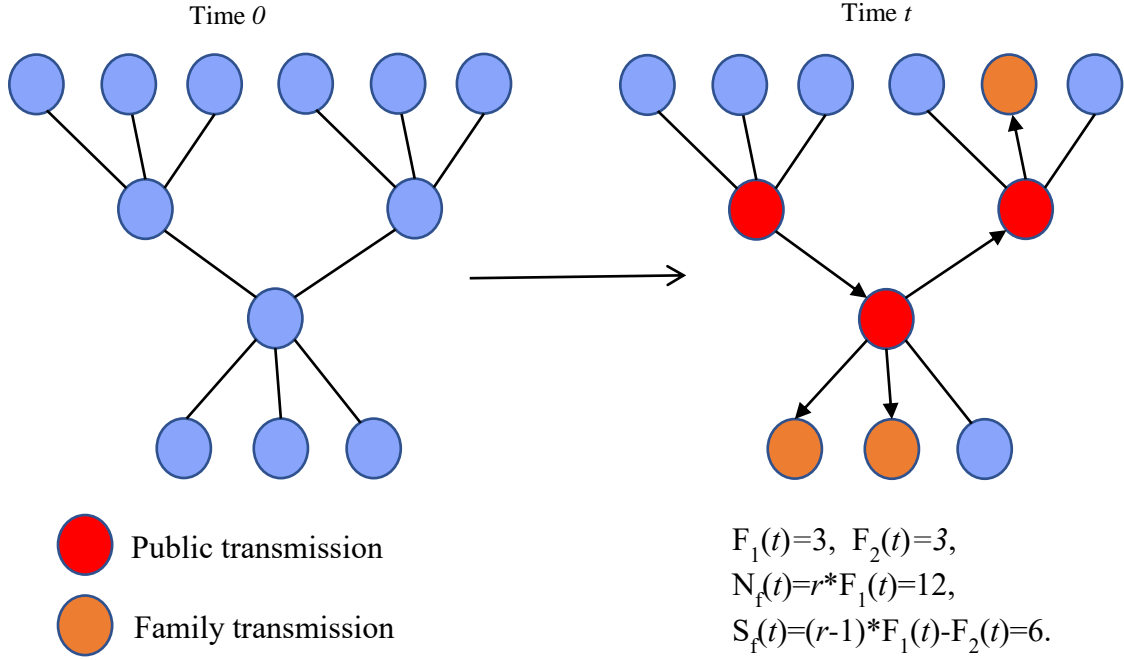

**Figure S2.** An example about the public and private transmission. The average number of family member  $r=4$ .

yet being confirmed were most at-risk of hospital-acquired infections. The estimated number of suspected individuals is approximately 100,000 in Wuhan, and the positive diagnosed rate was about 30-40%. Therefore,  $N_p$  was approximately 60000-70000 individuals. Similarly,  $S_p$  was given as

$$S_p(t) = N_p - F_3(t),$$

where  $F_3(t)$  denoted the accumulated number of non-COVID-19 patients infected through hospital contacts,

$$F_3(t) = \int_0^t \beta_{Ip}^{hos}(t) \frac{S_p \sum_{i=1}^3 I_i}{N_p} dt.$$

Further, for medical staff who were in direct contact with COVID-19 individuals, the overall population size ( $N_d$ ) was 120,000, accounting for 80,000 medical staff in Wuhan and 40,000 from the rest of the country. Similarly,  $S_d$  was given as

$$S_d(t) = N_d - F_4(t),$$

where  $F_4(t)$  denoted the accumulated number of medical staff infected through hospital contacts,

$$F_4(t) = \int_0^t \beta_{Id}^{hos}(t) \frac{S_d \sum_{i=1}^3 (D_i + T_i)}{N_d} dt.$$

### Modelling disease progression

Individuals in the incubation period ( $E$ ) progressed to the infectious compartment (infected but undiagnosed) with mild symptoms at a rate  $k_1$ . The progression rates from mild to moderate symptoms and from moderate to severe/critical symptoms were  $k_2$  and  $k_3$ , respectively. The detection rates of the infectious compartment with mild, moderate, and severe/critical symptoms by lab diagnosis are  $\delta_{t1}(t)$ ,  $\delta_{t2}$ , and  $\delta_{t3}$ , respectively. The detection

rates of the infectious compartment with mild, moderate, and severe/critical symptoms by clinical diagnosis were  $\delta_{d1}(t)$ ,  $\delta_{d2}$ , and  $\delta_{d3}$ , respectively.  $\tau$  denoted the detection rate in clinically diagnosed individuals with a previous negative lab test. The death rates of undiagnosed, clinical diagnosed, and lab diagnosed individuals with severe/critical symptoms are  $\mu_1, \mu_2, \mu_3$ , respectively. We assumed all diagnosed individuals were isolated but may still be able to transmit the virus to medical staff. Infected individuals with mild symptoms were assumed to recover spontaneously at a rate  $\rho_s$ . Lab diagnosed individuals on treatment who were in mild, moderate, and severe/critical stage would recover at the rate  $\rho_1(t), \rho_2(t), \rho_3(t)$ , respectively. Clinically diagnosed individuals at these three stages would recover at the rates  $\rho_{d1}(t), \rho_{d2}(t), \rho_{d3}(t)$ , respectively (Figure S1). The model was described by the following system of ordinary differential equations:

$$\left\{ \begin{aligned}
 \frac{dS}{dt} &= -\Lambda_{total}, \\
 \frac{dE}{dt} &= \Lambda_{total} - k_1 E, \\
 \frac{dI_1}{dt} &= k_1 E - (k_2 + \delta_{d1}(t) + \delta_{i1}(t) + \rho_s) I_1, \\
 \frac{dI_2}{dt} &= k_2 I_1 - (k_3 + \delta_{d2} + \delta_{i2}) I_2, \\
 \frac{dI_3}{dt} &= k_3 I_2 - (\delta_{d3} + \delta_{i3} + \mu_1) I_3, \\
 \frac{dD_1}{dt} &= \delta_{d1}(t) I_1 - (k_2 + \tau + \rho_s + \rho_{d1}(t)) D_1, \\
 \frac{dD_2}{dt} &= \delta_{d2} I_2 + k_2 D_1 - (k_3 + \tau + \rho_{d2}(t)) D_2, \\
 \frac{dD_3}{dt} &= \delta_{d3} I_3 + k_3 D_2 - (\tau + \rho_{d3}(t) + \mu_2) D_3, \\
 \frac{dT_1}{dt} &= \tau D_1 + \delta_{i1}(t) I_1 - (k_2 + \rho_s + \rho_1(t)) T_1, \\
 \frac{dT_2}{dt} &= \tau D_2 + \delta_{i2} I_2 + k_2 T_1 - (k_3 + \rho_2(t)) T_2, \\
 \frac{dT_3}{dt} &= \tau D_3 + \delta_{i3} I_3 + k_3 T_2 - (\rho_3(t) + \mu_3) T_3, \\
 \frac{dR}{dt} &= \rho_1(t) T_1 + \rho_2(t) T_2 + \rho_3(t) T_3 + \rho_{d1}(t) D_1 + \rho_{d2}(t) D_2 + \rho_{d3}(t) D_3 + \rho_s (I_1 + D_1 + T_1), \\
 \frac{dD}{dt} &= \mu_1 I_3 + \mu_2 D_3 + \mu_3 T_3.
 \end{aligned} \right. \quad (1)$$

The cumulative number of reported diagnosed cases, deaths, and recovered individuals according to treatment guidelines version 1-4 and 6-7 (lab diagnosis) were denoted as  $C_{diag}^{old}, C_{death}^{old}, C_{rec}^{old}$ . The cumulative number of reported diagnosed cases, deaths, and recovered individuals according to treatment guidelines version 5 (both lab and clinical diagnoses) were denoted as  $C_{diag}^{new}, C_{death}^{new}, C_{rec}^{new}$ , respectively. They were defined by the following equations:

$$\begin{aligned}
\frac{dC_{diag}^{old}}{dt} &= \tau(D_1 + D_2 + D_3) + \delta_{t_1}(t)I_1 + \delta_{t_2}I_2 + \delta_{t_3}I_3, \\
\frac{dC_{death}^{old}}{dt} &= \mu_3T_3, \\
\frac{dC_{rec}^{old}}{dt} &= \rho_1(t)T_1 + \rho_2(t)T_2 + \rho_3(t)T_3,
\end{aligned} \tag{2}$$

and

$$\begin{aligned}
\frac{dC_{diag}^{new}}{dt} &= (\delta_{d_1}(t) + \delta_{t_1}(t))I_1 + (\delta_{d_2} + \delta_{t_2})I_2 + (\delta_{d_3} + \delta_{t_3})I_3, \\
\frac{dC_{death}^{new}}{dt} &= \mu_2D_3 + \mu_3T_3, \\
\frac{dC_{rec}^{new}}{dt} &= \rho_1(t)T_1 + \rho_2(t)T_2 + \rho_3(t)T_3 + \rho_{d_1}(t)D_1 + \rho_{d_2}(t)D_2 + \rho_{d_3}(t)D_3.
\end{aligned} \tag{3}$$

## 2. Data sources and parameter estimation

We collected the data on the number of daily and cumulative confirmed cases and deaths from 10<sup>th</sup> January 2020 to 7<sup>th</sup> March 2020 from the Wuhan Municipal Health Commission [1] and the Health Commission of Hubei Province [9] (**Table S2**). The mean incubation time for COVID-19 was 5.2 days ( $1/k_1=5.2$ ) [9]. It followed from [11] that the median time from the first symptom to dyspnea was five days (interquartile range [IQR], 1-10) and from the onset of symptoms to ICU admission was ten days (IQR, 6-12) (Table 3). Therefore, we assumed that the meantime from mild to moderate symptoms was five days ( $1/k_2=5$ ), and the meantime from moderate to severe/critical was 10-5=5 days ( $1/k_3=5$ ). The mean time from mild symptoms to spontaneous recovery was ten days ( $1/\rho_5=10$ ) [12]. The mean number of members in a Chinese household was four [13]. It followed from [14] that the probability of transmission per contact with infectious individuals in the general population was  $\beta=0.09$  (0.0873-0.1057) based on the ratio of the cumulative confirmed cases and the cumulative individuals with close contact. We assumed the probability of transmission per contact  $\beta_{hos}$  in the hospital was only 3% of that in the general population due to strict sterilised environment in the hospital, i.e.,  $\beta_{hos} = 0.03 \times \beta = 0.0027$ . The probability of transmission per contact with latent individuals was assumed to be half ( $1 - \varepsilon=0.5$  [0.1-0.9]) of that with infectious individuals [12].

The facial mask usage rate in the public space is drastically increased during the epidemic [15][16], and we assumed a logistic growth for this percentage, i.e.,  $p_1(t) = p_{ini} + \frac{\bar{p}-p_{ini}}{1+\exp(-0.5(t-t_{ini}))}$ , where  $t_{ini} = 15$  is the time when the metropolitan-wide quarantine (23<sup>rd</sup> January) initiated but with two days delay,  $p_{ini}$  is the background facial masks usage rate in the public space before the epidemic, and  $\bar{p}$  is the maximal facial masks usage rate in the public space during the epidemic. An observational survey [17] in the street in Beijing show that only about 10% of people wear the facial mask in routine life in winter, so we assumed  $p_{ini} = 10\%$  as the base case facial mask usage in the absence of COVID-19. The data in [15] showed that 97.6% of customers wear the facial mask in the shops in Wuhan city after quarantine (23<sup>rd</sup> January- 10<sup>th</sup> February 2020). Another online survey [18] show that 97.3-99.3% of people wear the facial mask in the public space, so we assume  $\bar{p} = 97.6\%$  (97.3-99.3%). The usage rate of facial mask in the private space  $p_2$  is set as zero [19], and in the hospital facial mask usage  $p_3$  was set as 100% based on the field data. The effectiveness of mask to prevent infection for the general population  $\theta_1$  and for the medical staff  $\theta_2$  are

chosen as 80% (50-95%) and 95% (90%-100%) (medical staff was assumed to be better equipped), respectively, based on one meta-analysis against respiratory infections [20] and retrospective study against COVID-19 [21].

The data in [15] show that the number of daily customers has reduced by 71-94% since the quarantine on 23 Jan, so we assume the average number of daily contacts in the public space  $m_1(t)$  has reduced by 80% in the base case, with a decreasing logistic function,  $m_1(t) = m_{ini} + \frac{0.2m_{ini}-m_{ini}}{1+\exp(-0.3(t-t_{ini}))}$ , where  $m_{ini}$  is the background daily contact number in the public space before the quarantine and was model-estimated. Home confinement led to three times longer ‘stay at home’ duration than the pre-quarantine level [13], so we assume the average number of daily contacts in a household increased from 4 to 12, in the form of an increasing logistic function,  $m_2(t) = 4 + \frac{12-4}{1+\exp(-0.5(t-t_{ini}))}$ . The average number of daily contacts between patients was estimated as 20 (10-30), and a medical staff member would be in contact with an average of 60 (50-120) infected individuals. Both numbers were based on field data. Both numbers were allowed to decrease at the same rate as the number of diagnosed infected individuals after the peak of the epidemic.

The lab diagnosis rate of individuals with severe/critical symptoms ( $\delta_{t3}$ ) and moderate symptoms ( $\delta_{t2}$ ) are chosen as 100% [11][12] and 50% [12], respectively. The lab diagnosis rate of individuals with mild symptoms increases gradually as more health resources became available, and we assumed an increasing logistic function,  $\delta_{t1}(t) = 0.05 + \frac{\overline{\delta_{t1}}-0.05}{1+\exp(-0.5(t-t_{ini}))}$ . This function indicated that only 5% of the patients with mild symptoms was diagnosed daily initially but this rate increases to a higher value of  $\overline{\delta_{t1}}$  (model-estimated) over time. We assumed the clinical diagnosis rates for individuals with mild ( $\delta_{d1}(t)$ ), moderate ( $\delta_{d2}$ ), and severe/critical symptoms ( $\delta_{d3}$ ) were proportional to the lab diagnosis rates with a factor  $f$  (model-estimated), i.e.,  $\delta_{d1}(t) = f \times \delta_{t1}(t)$ ,  $\delta_{d2} = f \times \delta_{t2}$ ,  $\delta_{d3} = f \times \delta_{t3}$ .

The recovery rate of treated individuals with severe/critical symptoms  $\rho_3(t)$  increased over time as more health resources became available, and we assumed an increasing logistic function,  $\rho_3(t) = \frac{\overline{\rho_3}}{1+\exp(-\rho_{3k}(t-t_\rho))}$ , where  $\overline{\rho_3}$  was the maximal recovery rate during the epidemic,  $\rho_{3k}$  was the growth rate of recovery, and  $t_\rho$  was the time when the recovery rate is half of the maximal recovery rate. All three parameters were model-estimated. According to the report of the WHO-China Joint Mission on COVID-19 [22], the average recovery period for individuals with mild and severe/critical symptoms were 2 and 4.5 weeks, respectively. Thus, we assumed the average recovery period for individuals with moderate symptoms was the average of the two, which was 3.25 weeks. According to these durations, recovery rate of individuals with a moderate symptom was 1.38 times faster than individuals with a severe/critical symptom, that is  $\rho_2(t) = 1.38 \times \rho_3(t)$ . Similarly, recovery rate of individuals with a mild symptom was 2.25 times faster than individuals with a severe/critical symptom, that is  $\rho_1(t) = 2.25 \times \rho_3(t)$ . We assumed the recovery rates of clinically diagnosed individuals with mild ( $\rho_{d1}(t)$ ), moderate ( $\rho_{d2}(t)$ ), and severe/critical symptoms ( $\rho_{d3}(t)$ ) were proportional to the recovery rates of lab diagnosed individuals [23] and denoted this factor as  $q$  (model-estimated), i.e.,  $\rho_{d1}(t) = q \times \rho_1(t)$ ,  $\rho_{d2}(t) = q \times \rho_2(t)$ ,  $\rho_{d3}(t) = q \times \rho_3(t)$ .

The total population size in Wuhan city was 11,081,000 based on China Population and Employment Statistics Yearbook in 2019. The initial values of the disease states were given as  $I_1(0)=41$ ,  $N(0)= 11,081,000$ , and the initial values of other variables are 0. We left  $E(0)$  as a model-estimated parameter.



We calibrated the model to the daily confirmed cases and deaths data from 10<sup>th</sup> January 2020 to 7<sup>th</sup> March 2020 by using a nonlinear least-squares method. The unknown parameters (**Table S1**) were sampled within their bounds by the Latin hypercube sampling method and repeated 1000 times. For every simulation, we calculated the sum of squared errors between the model output and data, and selected the top 10% with the least square errors was selected to form a new dataset. The selected dataset was then used to generate a new set of narrower bounds, and the parameters were resampled 1000 times within the new bounds for a new round of simulation. We repeated this iteration for ten times, and the last selected dataset was used to generate the 95% confidence intervals. All analyses and simulations were performed in MATLAB R 2019a.

Based on these estimated parameter values, we predicted the risk of secondary outbreak for different contact rate after lifting the quarantine (50%, 80%, 100%, 150% of contact rate in the public space before the lockdown), mask usage rate (95%, 80%, 50%, 10%), and the time to lift the quarantine (21<sup>th</sup> March, 28<sup>th</sup> March, 4<sup>st</sup> April, 11<sup>th</sup> April, 18<sup>th</sup> April and 25<sup>th</sup> April).

**Table S1. The parameter table for the model simulation.**

| Parameter denotation | Parameter description                                                                         | Range or 95%CI                       | Sources         |
|----------------------|-----------------------------------------------------------------------------------------------|--------------------------------------|-----------------|
| $1/k_1$              | The mean incubation time (days)                                                               | 5.2 (4.1-7.0)                        | [9][9]          |
| $1/k_2$              | The mean time from mild to moderate symptoms (days)                                           | 5 (1-10)                             | [11]            |
| $1/k_3$              | The mean time from moderate to severe/critical symptoms (days)                                | 5 (2-5)                              | [11]            |
| $1/\rho_s$           | The mean time from mild symptoms to spontaneous recovery (days)                               | 10                                   | [12]            |
| $\tau$               | Detection rate in clinically diagnosed individuals with previous negative lab test results    | 0.0997 (0.0969-0.1034)               | Model-estimated |
| $\mu_1$              | Death rate of undiagnosed individuals with severe/critical symptoms                           | 0.0398 (0.0373-0.0428)               | Model-estimated |
| $\mu_2$              | Death rate in clinically diagnosed individuals with severe/critical symptoms                  | 0.0287 (0.0136-0.0441) $\times\mu_1$ | Model-estimated |
| $\mu_3$              | Death rate of lab diagnosed individuals with severe/critical symptoms                         | 0.4117 (0.3461-0.4808) $\times\mu_1$ | Model-estimated |
| $r$                  | The mean number of members in a family                                                        | 4                                    | [13]            |
| E(0)                 | The initial value of latent individuals                                                       | 20.0446 (18.7456-21.3011)            | Model-estimated |
| $\beta$              | The per-act transmission probability while in contact with infected individuals with symptoms | 0.09                                 | [14]            |

|                     |                                                                                                                   |                                                                       |                 |
|---------------------|-------------------------------------------------------------------------------------------------------------------|-----------------------------------------------------------------------|-----------------|
| $\varepsilon_{hos}$ | The reduction in per-act transmission probability in a hospital setting                                           | 97%                                                                   | Assumed         |
| $\varepsilon$       | The reduction in per-act transmission probability if infection is in latency                                      | 50% (10-90%)                                                          | [12]            |
| $p_1(t)$            | The usage rate of facial mask in the public space                                                                 | $p_{ini} + \frac{\bar{p} - p_{ini}}{1 + \exp(-0.5(t - t_{ini}))}$     | [15][16]        |
| $t_{ini}$           | Time when the behavioural changes began (2 day after quarantine)                                                  | 15                                                                    | [15]            |
| $p_{ini}$           | Background facial masks usage in the public space before the epidemic                                             | 10%                                                                   | [17]            |
| $\bar{p}$           | Facial masks usage in the public space during quarantine                                                          | 97.6% (97.3-99.3%)                                                    | [15][16]        |
| $p_2$               | The usage rate of facial mask in the private space                                                                | 0%                                                                    | [19]            |
| $p_3$               | The usage rate of facial mask in the hospital                                                                     | 100%                                                                  | Field data      |
| $\theta_1$          | The effectiveness of mask to prevent infection for the general population                                         | 0.8 (0.5-0.95)                                                        | [20][21]        |
| $\theta_2$          | The effectiveness of mask to prevent infection for the medical staff                                              | 0.95 (0.9-1)                                                          | [20][21]        |
| $m_1(t)$            | The average number of daily contacts in the public space                                                          | $m_{ini} + \frac{0.2m_{ini} - m_{ini}}{1 + \exp(-0.3(t - t_{ini}))}$  | [15]            |
| $m_{ini}$           | Background daily contact number in the public space                                                               | 7.3492 (7.2157-7.5231)                                                | Model-estimated |
| $m_2(t)$            | The average number of daily contacts in the private space                                                         | $4 + \frac{12 - 4}{1 + \exp(-0.5(t - t_{ini}))}$                      | [13]            |
| $m_3$               | The average number of contacts between patients in a hospital setting                                             | 20 (10-30)                                                            | Field data      |
| $m_4$               | The average number of daily contacts between medical staff members and infected individuals in a hospital setting | 60 (50-120)                                                           | Field data      |
| $\delta_{t1}(t)$    | Diagnosis rate of individuals with a mild symptom (lab diagnosis)                                                 | $0.05 + \frac{\bar{\delta}_{t1} - 0.05}{1 + \exp(-0.5(t - t_{ini}))}$ | Assumed         |
| $\bar{\delta}_{t1}$ | Maximum diagnosis rate of individuals with mild symptom (lab diagnosis)                                           | 49.5% (48.6-53.7%)                                                    | Model-estimated |
| $\delta_{t2}$       | Diagnosis rate of individuals                                                                                     | 50%                                                                   | [12]            |

|                  |                                                                                  |                                                                               |                 |
|------------------|----------------------------------------------------------------------------------|-------------------------------------------------------------------------------|-----------------|
|                  | with a moderate symptom<br>(lab diagnosis)                                       |                                                                               |                 |
| $\delta_{t3}$    | Diagnosis rate of individuals with severe/critical symptoms (lab diagnosis)      | 100%                                                                          | [11][12]        |
| $\delta_{d1}(t)$ | Diagnosis rate of individuals with a mild symptom (clinical diagnosis)           | $0.5408 (0.5366 - 0.5482) \times \delta_{t1}(t)$ ,                            | Model-estimated |
| $\delta_{d2}$    | Diagnosis rate of individuals with a moderate symptom (clinical diagnosis)       | $0.5408 (0.5366 - 0.5482) \times \delta_{t2}$                                 | Model-estimated |
| $\delta_{d3}$    | Diagnosis rate of individuals with severe/critical symptoms (clinical diagnosis) | $0.5408 (0.5366 - 0.5482) \times \delta_{t3}$                                 | Model-estimated |
| $\rho_3(t)$      | Recovery rate of treated individuals with severe/critical symptoms               | $\frac{\bar{\rho}_3}{1 + \exp(-\rho_{3k}(t - t_\rho))}$                       | Assumed         |
| $\bar{\rho}_3$   | Maximum recovery rate of treated individuals with severe/critical symptoms       | 0.2524 (0.2247-0.2884)                                                        | Model-estimated |
| $\rho_{3k}$      | Growth rate of recovery rate                                                     | 0.0276 (0.0121-0.0416)                                                        | Model-estimated |
| $t_\rho$         | The time when the recovery rate is half of the maximal recovery rate             | 30.7530 (13.5650-45.6510)                                                     | Model-estimated |
| $\rho_1(t)$      | Recovery rate of treated individuals with mild symptoms                          | $2.25 \times \rho_3(t)$                                                       | [22]            |
| $\rho_2(t)$      | Recovery rate of treated individuals with moderate symptoms                      | $1.38 \times \rho_3(t)$                                                       | [22]            |
| $\rho_{d1}(t)$   | Recovery rate of clinically diagnosed individuals with mild symptoms             | $0.4087 (0.2179 - 0.6911) \times \rho_1(t)$ during 12-18 Feb;<br>0, Otherwise | Model-estimated |
| $\rho_{d2}(t)$   | Recovery rate of clinically diagnosed individuals with moderate symptoms         | $0.4087 (0.2179 - 0.6911) \times \rho_2(t)$ during 12-18 Feb;<br>0, Otherwise | Model-estimated |
| $\rho_{d3}(t)$   | Recovery rate of clinically diagnosed individuals with severe/critical symptoms  | $0.4087 (0.2179 - 0.6911) \times \rho_3(t)$ during 12-18 Feb;<br>0, Otherwise | Model-estimated |

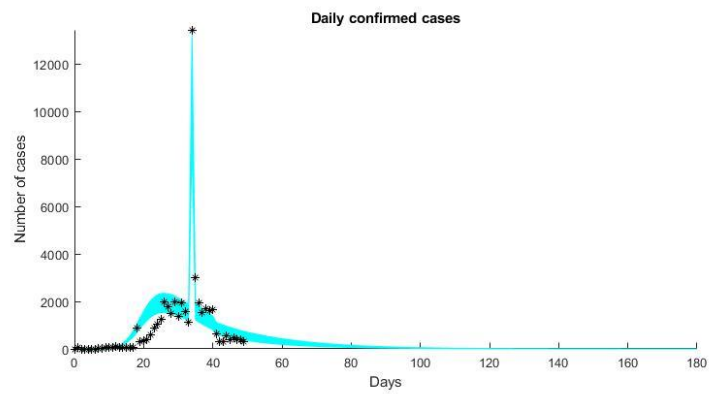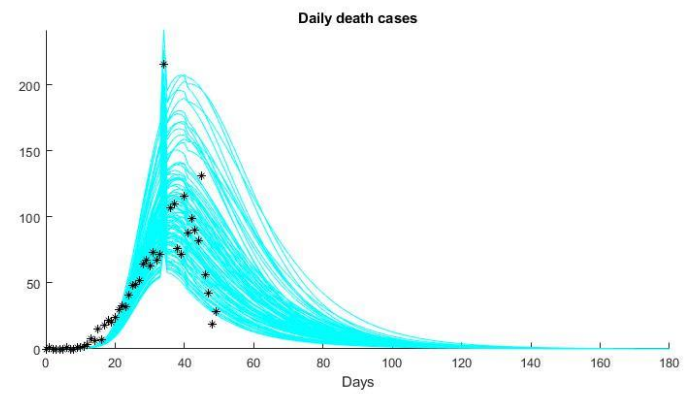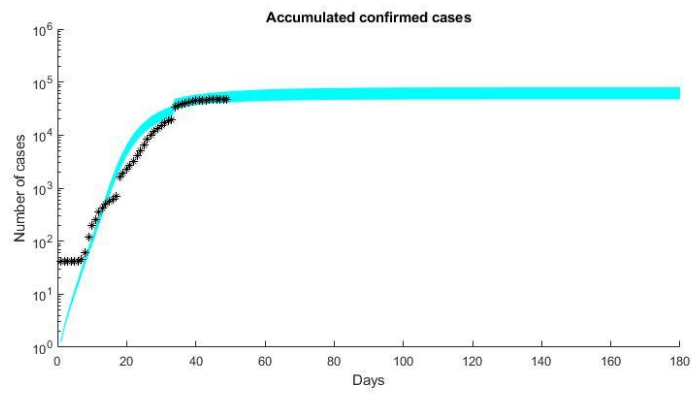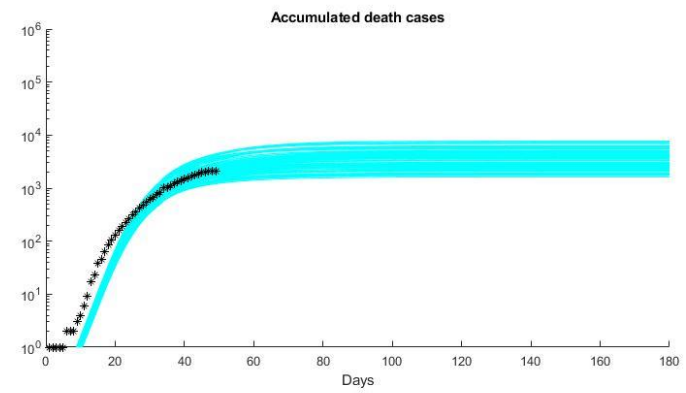

1  
2 **Figure S3.** Model calibration to the number of daily and accumulated confirmed cases and deaths.  
3

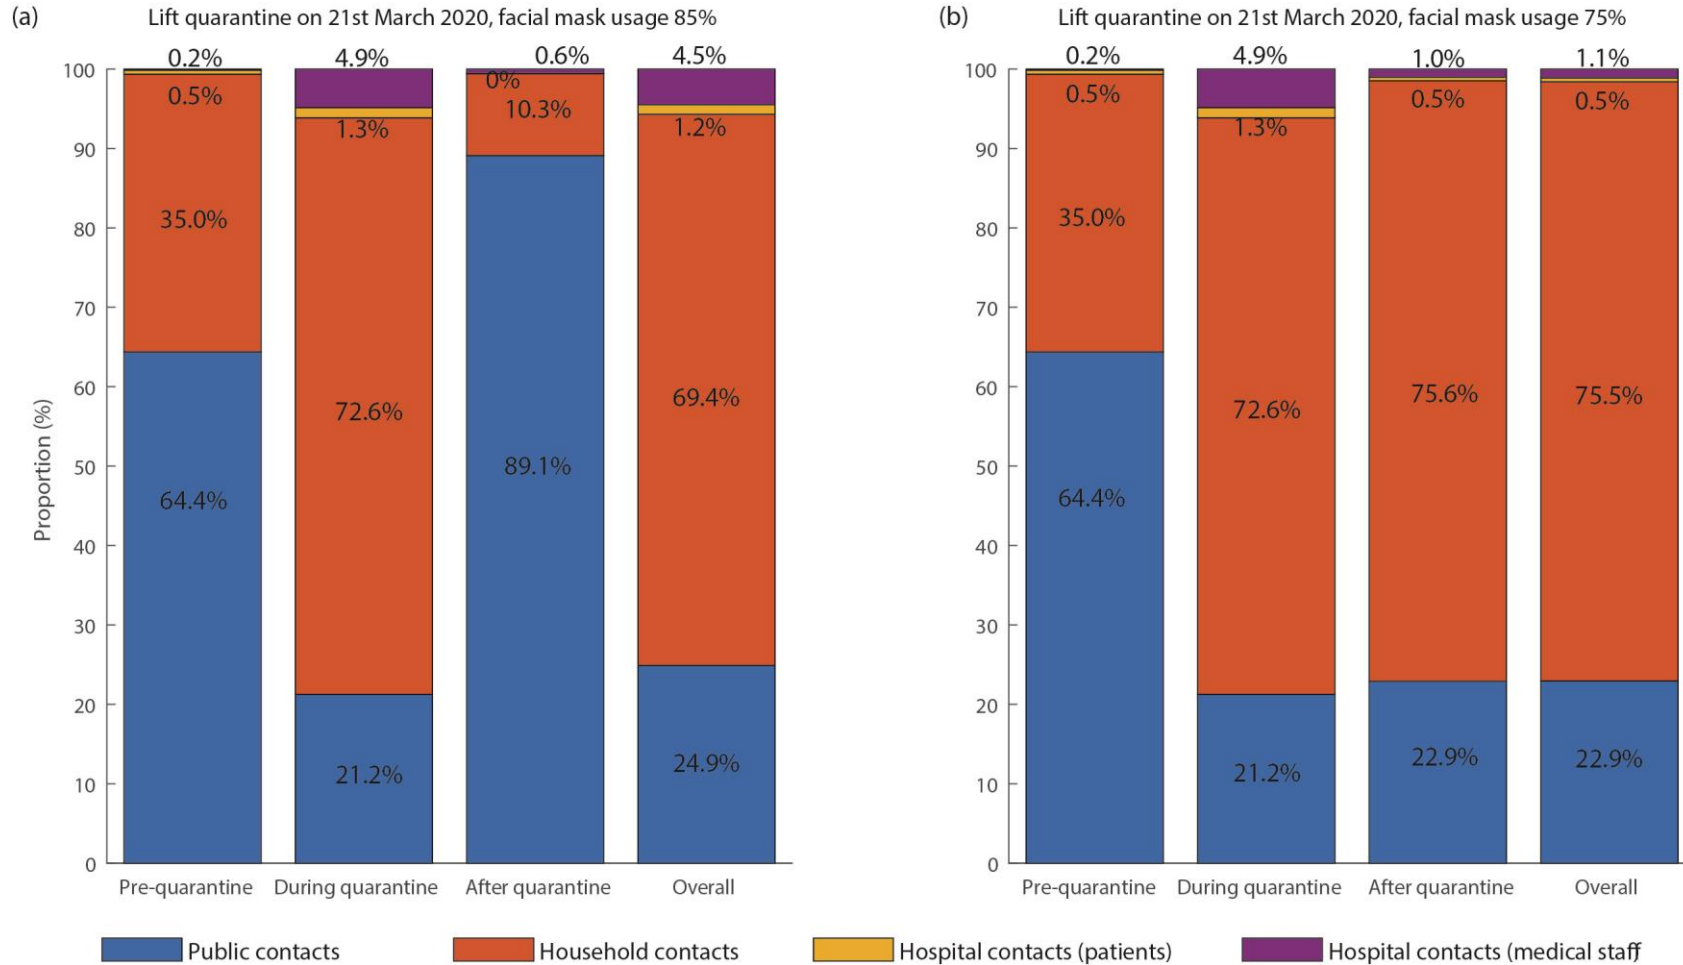

4  
5 **Figure S4.** Comparison of the composition of transmission routes in two different resumption scenarios: (a) life city quarantine on 19<sup>th</sup> March  
6 2020 with a 100% public contact rate and 85% facial mask usage; this leads to smooth decline of the epidemic; (b) life city quarantine on 19<sup>th</sup>  
7 March 2020 with a 100% public contact rate and 80% facial mask usage; this leads to a second major outbreak. (Blue: public contacts; Brown:  
8 household contacts; Yellow: hospital-acquired infections in non-COVID-19 patients; Purple: hospital-acquired infections in medical staff).

9  
10

**Table S2. Data source: reported cumulative confirmed cases, and deaths data in Wuhan city, Hubei Province, China [1,2].**

| Date      | Cases | Deaths |
|-----------|-------|--------|
| 2020-1-10 | 41    | 1      |
| 2020-1-11 | 41    | 1      |
| 2020-1-12 | 41    | 1      |
| 2020-1-13 | 41    | 1      |
| 2020-1-14 | 41    | 1      |
| 2020-1-15 | 41    | 2      |
| 2020-1-16 | 45    | 2      |
| 2020-1-17 | 62    | 2      |
| 2020-1-18 | 121   | 3      |
| 2020-1-19 | 198   | 4      |
| 2020-1-20 | 258   | 6      |
| 2020-1-21 | 363   | 9      |
| 2020-1-22 | 425   | 17     |
| 2020-1-23 | 495   | 23     |
| 2020-1-24 | 572   | 38     |
| 2020-1-25 | 618   | 45     |
| 2020-1-26 | 698   | 63     |
| 2020-1-27 | 1590  | 85     |
| 2020-1-28 | 1905  | 105    |
| 2020-1-29 | 2261  | 129    |
| 2020-1-30 | 2639  | 159    |
| 2020-1-31 | 3215  | 192    |
| 2020-2-1  | 4109  | 224    |
| 2020-2-2  | 5142  | 265    |
| 2020-2-3  | 6384  | 313    |
| 2020-2-4  | 8351  | 362    |
| 2020-2-5  | 10117 | 414    |
| 2020-2-6  | 11618 | 478    |
| 2020-2-7  | 13603 | 545    |
| 2020-2-8  | 14982 | 608    |
| 2020-2-9  | 16902 | 681    |
| 2020-2-10 | 18454 | 748    |
| 2020-2-11 | 19559 | 820    |
| 2020-2-12 | 32994 | 1036   |
| 2020-2-13 | 35991 | 1016   |
| 2020-2-14 | 37914 | 1123   |
| 2020-2-15 | 39462 | 1233   |
| 2020-2-16 | 41152 | 1309   |
| 2020-2-17 | 42752 | 1381   |
| 2020-2-18 | 44412 | 1497   |
| 2020-2-19 | 45027 | 1585   |
| 2020-2-20 | 45346 | 1684   |
| 2020-2-21 | 45660 | 1774   |
| 2020-2-22 | 46201 | 1856   |
| 2020-2-23 | 46607 | 1987   |
| 2020-2-24 | 47071 | 2043   |

---

|           |       |      |
|-----------|-------|------|
| 2020-2-25 | 47441 | 2085 |
| 2020-2-26 | 47824 | 2104 |
| 2020-2-27 | 48137 | 2132 |
| 2020-2-28 | 48557 | 2169 |
| 2020-2-29 | 49122 | 2195 |
| 2020-3-1  | 49315 | 2227 |
| 2020-3-2  | 49426 | 2251 |
| 2020-3-3  | 49540 | 2282 |
| 2020-3-4  | 49671 | 2305 |
| 2020-3-5  | 49797 | 2328 |
| 2020-3-6  | 49871 | 2349 |
| 2020-3-7  | 49912 | 2370 |

---

11  
12  
13  
14  
15  
16  
17  
18  
19  
20  
21  
22  
23  
24  
25  
26  
27  
28  
29  
30  
31  
32  
33  
34  
35

36 **References**

- 37 [1]. Wuhan Municipal Health Commission. *Public announcement*. 2020; Available from:  
38 <http://wjw.wuhan.gov.cn/front/web/list2nd/no/710>.
- 39 [2]. Province, H.C.o.H. *Daily report of COVID-19*. 2020; Available from:  
40 <http://wjw.hubei.gov.cn>.
- 41 [3]. National Health Commission China. *National Health Commission of the People's*  
42 *Republic of China. New coronavirus pneumonia diagnosis and treatment plan (Version*  
43 *5)*. 2020. . 2020 [cited 2020 10th March]; Available from:  
44 <http://www.nhc.gov.cn/yzygj/s7653p/202002/d4b895337e19445f8d728fcdf1e3e13a.shtml>  
45 [1](#).
- 46 [4]. National Health Commission China. *National Health Commission of the People's*  
47 *Republic of China. New coronavirus pneumonia diagnosis and treatment plan (Version*  
48 *6)*. 2020. 2020 [cited 2020 10th March]; Available from:  
49 [http://www.nhc.gov.cn/yzygj/s7653p/202002/8334a8326dd94d329df351d7da8aefc2.sht](http://www.nhc.gov.cn/yzygj/s7653p/202002/8334a8326dd94d329df351d7da8aefc2.shtml)  
50 [ml](#).
- 51 [5]. Bai, Y., et al., *Presumed Asymptomatic Carrier Transmission of COVID-19*. JAMA,  
52 2020.
- 53 [6]. Yu, P., et al., *A Familial Cluster of Infection Associated With the 2019 Novel*  
54 *Coronavirus Indicating Possible Person-to-Person Transmission During the Incubation*  
55 *Period*. The Journal of Infectious Diseases, 2020.
- 56 [7]. Offeddu, V., et al., *Effectiveness of Masks and Respirators Against Respiratory*  
57 *Infections in Healthcare Workers: A Systematic Review and Meta-Analysis*. Clin Infect  
58 Dis, 2017. **65**(11): p. 1934-1942.
- 59 [8]. Wuhan Municipal Health Commission. Daily report of COVID-19.  
60 <http://wjw.wuhan.gov.cn/front/web/list2nd/no/710> [Accessed 4 Mar 2020]
- 61 [9]. Health Commission of Hubei Province. Daily report of COVID-19.  
62 <http://wjw.hubei.gov.cn/> [Accessed 4 Mar 2020]
- 63 [10]. Li Q, Guan XH, Wu P, et al. Early Transmission Dynamics in Wuhan, China, of  
64 Novel Coronavirus–Infected Pneumonia. 2020. N Engl J Med.  
65 DOI:10.1056/NEJMoa2001316
- 66 [11]. Wang D, Hu B, Hu C. Clinical Characteristics of 138 Hospitalized Patients With 2019  
67 Novel Coronavirus-Infected Pneumonia in Wuhan, China. JAMA. 2020 Feb 7. doi:  
68 10.1001/jama.2020.1585.
- 69 [12]. Wei Y, Lu Z, Du Z, et al. Fitting and forecasting the trend of COVID-19 by  
70 SEIR+CAQ dynamic model. Chin J Epidemiol. 2020; 41(4):470-475.
- 71 [13]. Chen B, Ai C, Ma L, et al. We should prepare for the transmission of COVID-19 in  
72 the long run: simulating the risk of the secondary outbreak after holiday. Journal of  
73 System Simulation. 2020; <http://www.china-simulation.com/CN/Y2020/V0/I0/0>
- 74 [14]. Liang J. National Health Commission: The growth rate has decreased to 25.69% in  
75 the 10<sup>th</sup> day for controlling the COVID-19. [https://www.businesstimeschina.com/articles-](https://www.businesstimeschina.com/articles-420695-20200131-w1082e1082t8939.htm)  
76 [420695-20200131-w1082e1082t8939.htm](https://www.businesstimeschina.com/articles-420695-20200131-w1082e1082t8939.htm) [Accessed 4 Mar 2020]
- 77 [15]. Kejixun. Liebao Mobile robot data: The facial mask usage rate reached 97.6% in  
78 Wuhan city during the epidemic. <http://m.kejixun.com/article/200224/488396.shtml>  
79 [Accessed 4 Mar 2020]
- 80 [16]. Huailiang Wu, Jian Huang, Casper J. P. Zhang, et al. Facemask shortage and the  
81 novel coronavirus (2019-nCoV) outbreak: Reflection on public health measures.  
82 <https://doi.org/10.1101/2020.02.11.20020735> [Accessed 4 Mar 2020]



- 83 [17]. Mao M, Wang M, Zhang S. How many people wear facial masks in Beijing? A street  
84 mask observation practice was conducted here.  
85 [https://www.thepaper.cn/newsDetail\\_forward\\_1592513](https://www.thepaper.cn/newsDetail_forward_1592513) [Accessed 4 Mar 2020]
- 86 [18]. Gu J, Li J, Hao Y, et al. Bulletin of COVID-19 online survey.  
87 <http://sph.sysu.edu.cn/article/1257> [Accessed 4 Mar 2020]
- 88 [19]. CCTV. How to protect yourself when returning? Whether it is necessary to wear  
89 facial masks at home?  
90 <http://jiankang.cctv.com/2020/01/31/ARTIBRA7riu1PKMGS9BaqPkD200131.shtml>  
91 [Accessed 4 Mar 2020]
- 92 [20]. Offeddu V, Yung CF, Fong Low MS, et al. Effectiveness of masks and respirators  
93 against respiratory infections in healthcare workers: A systematic review and meta-  
94 analysis. Clin Infect Dis. 2017;65(11):1934-1942.
- 95 [21]. Xinghuan Wang, Zhenyu Pan, Zhenshun Cheng, Association between COVID-  
96 19transmission and N95 respirator use. doi:  
97 <https://doi.org/10.1101/2020.02.18.20021881>
- 98 [22]. World Health Organization. Report of the WHO-China Joint Mission on Coronavirus  
99 Disease 2019 (COVID-19). [https://www.who.int/docs/default-source/coronaviruse/who-  
100 china-joint-mission-on-covid-19-final-report.pdf](https://www.who.int/docs/default-source/coronaviruse/who-china-joint-mission-on-covid-19-final-report.pdf) [Accessed 4 Mar 2020]
- 101 [23]. National Health Commission of the People's Republic of China. The 5<sup>th</sup> version  
102 diagnosis and treatment guidelines of COVID-19.  
103 [http://www.nhc.gov.cn/yzygj/s7653p/202002/d4b895337e19445f8d728fcfa1e3e13a.shtm  
104 l](http://www.nhc.gov.cn/yzygj/s7653p/202002/d4b895337e19445f8d728fcfa1e3e13a.shtml) [Accessed 4 Mar 2020]

105

106

107
